# Supplementary material for: Identification of a class of non-conventional ER-stress-response-derived immunogenic peptides
Source: PubMed Central journal article supplement — Cell Rep. 2021 Jul 6;36(1):109312. doi: 10.1016/j.celrep.2021.109312 (PMC8278487; doi:10.1016/j.celrep.2021.109312), 2021-07-06
Supplement: mmc1.pdf [file mmc1.pdf]

**Cell Reports, Volume 36**

**Supplemental information**

**Identification of a class of non-conventional**

**ER-stress-response-derived**

**immunogenic peptides**

**Alessia Melacarne, Valentina Ferrari, Luca Tiraboschi, Michele Mishto, Juliane Liepe, Marina Aralla, Laura Marconato, Michela Lizier, Chiara Pozzi, Offer Zeira, Giuseppe Penna, and Maria Rescigno**

# 1 SUPPLEMENTAL INFORMATION

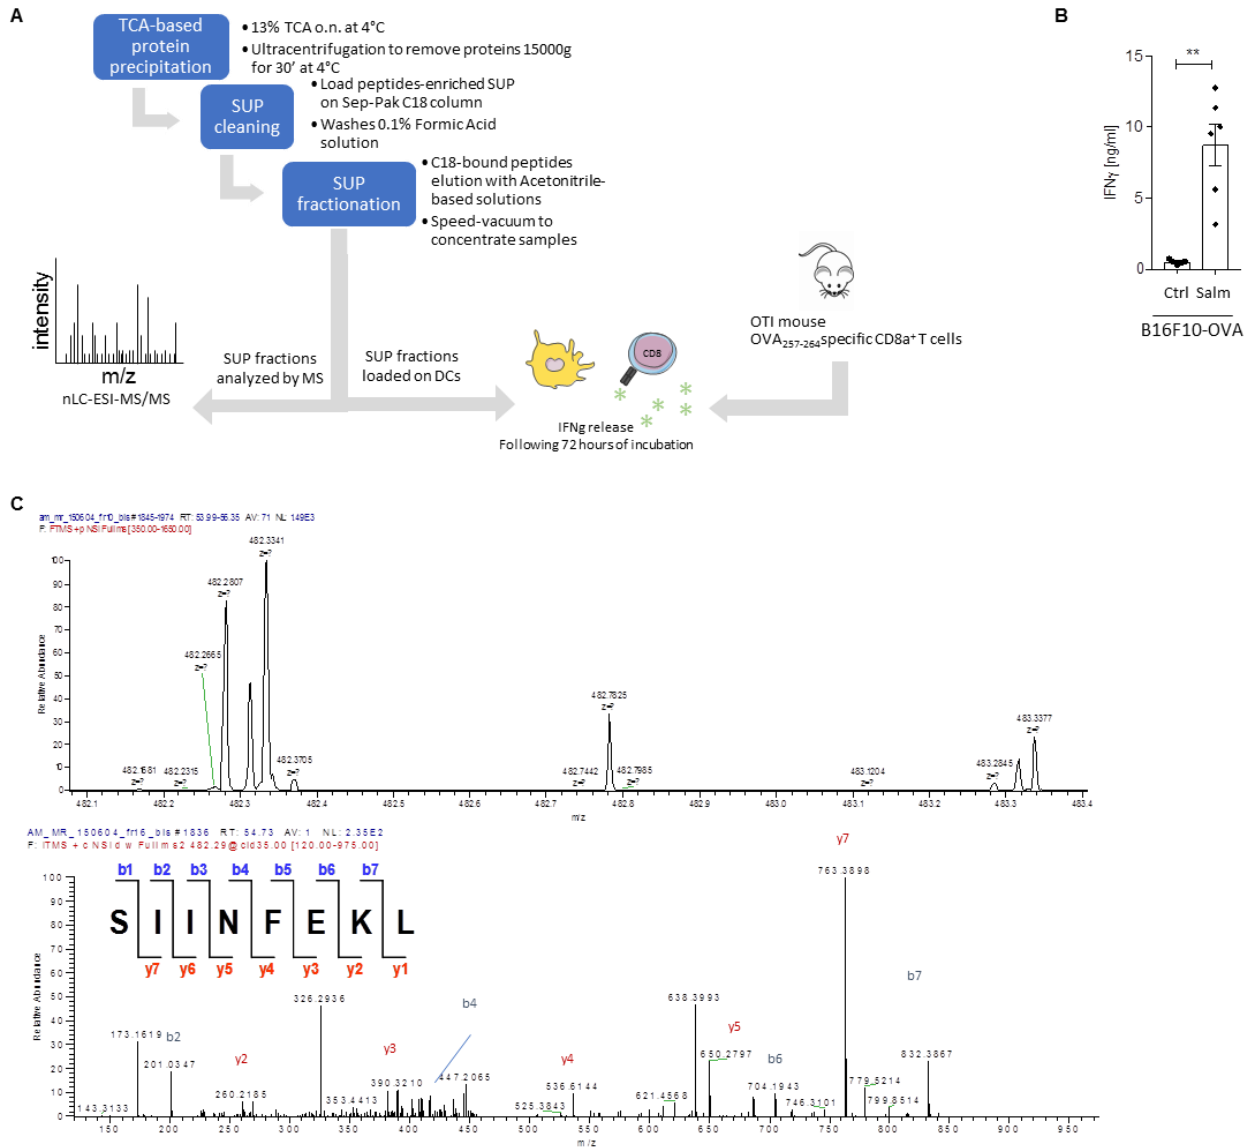

2

3 **Figure S1. B16F10-OVA cells infected with *Salmonella* release peptides**  
 4 **among which the immunogenic OVA-derived peptide SIINFEKL.** (A)  
 5 Pipeline to assess the release of OVA<sub>257-264</sub> peptide by B16F10-OVA cells upon  
 6 *Salmonella* infection. Secretomes (SUP) were collected, proteins precipitated  
 7 overnight at 4°C with trichloroacetic acid (TCA). Enriched peptides were  
 8 desalted using Sep-Pak C18 and fractionated eluting them with Acetonitrile  
 9 solution. Fractions were either loaded on DCs to test OVA-specific CD8<sup>+</sup> T cell

10 activation or underwent MS analysis. (B) ELISA quantification of IFN- $\gamma$  released  
11 by OVA<sub>257-264</sub>-specific OTI-CD8 (n>3). (C) MS analysis. OVA<sub>257-264</sub> (sequence:  
12 SIINFEKL) is mostly detected as double charge m/z=482.28 z=2. nLC-ESI-  
13 MS/MS spectrum of (m/z 482.28, z = +2) confirmed OVA<sub>257-264</sub> identity. See  
14 also Figure 1

15

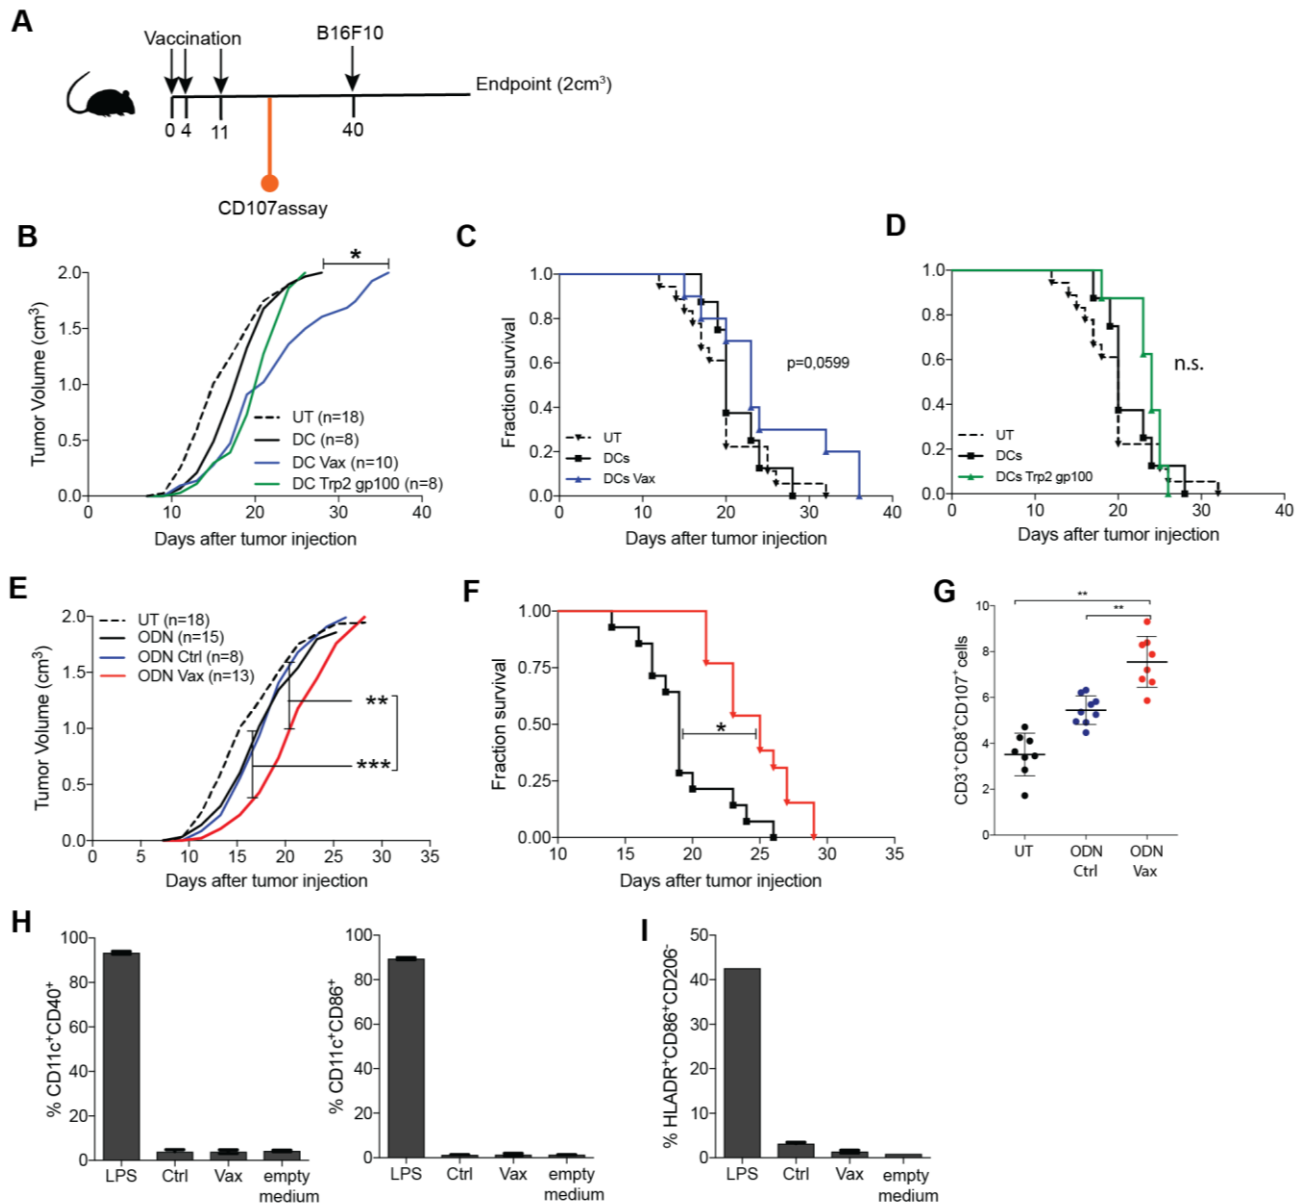

16

17 **Figure S2 Peptides released by *Salmonella*-treated B16F10 cells induce**  
 18 **an antitumor response in vivo either loaded on DCs or administered in**  
 19 **combination with ODN1826.** (A) Scheme of the immunization in vivo  
 20 experiment. (B) Tumor growth and (C-D) Kaplan–Meier survival curves of mice  
 21 immunized with DCs alone (DC), DCs loaded with melanoma antigens Trp2<sub>180-</sub>  
 22 188 gp100<sub>25-33</sub> (DC Trp2 gp100), and DCs loaded with peptides released by  
 23 *Salmonella*-treated B16F10 cells (DC Vax); not immunized mice (untreated,  
 24 UT) (n=6-12 mice per group). (E) Tumor growth and (F) Kaplan–Meier survival  
 25 curves of mice immunized with ODN1826 alone (ODN), ODN combined with

26 secretome of *Salmonella*-infected B16F10 (ODN Vax), and secretome of  
27 untreated B16F10 cells (ODN Ctrl); mice not immunized (UT). Data are pooled  
28 from two independent experiments (n=5-9 mice per group). (G) Frequency of  
29 CD3<sup>+</sup>CD8<sup>+</sup>CD107a<sup>+</sup> (degranulating T cells) from PBMCs of immunized mice.  
30 Data of two pooled experiments are represented as mean ± SD using a scatter  
31 dot plot. (H-I) Frequency of (H) CD11c<sup>+</sup>CD40<sup>+</sup> and CD11c<sup>+</sup>CD86<sup>+</sup> murine DCs,  
32 and of (I) HLADR<sup>+</sup>CD86<sup>+</sup>CD206<sup>-</sup> primary human monocytes-derived DCs upon  
33 stimulation with LPS, with secretomes from *Salmonella*-treated B16F10  
34 melanoma tumor cells (Vax), and with secretome from untreated cells (Ctrl).  
35 Data are represented as mean ± SD (n=2). Statistical analysis was evaluated  
36 using two-sided Mann-Whitney test (G,H,I), one-way ANOVA (B,E), or Log-  
37 rank Mantel-Cox test (C,D,F) \**P*<0,05 \*\**P*<0.01. See also Figure 2.

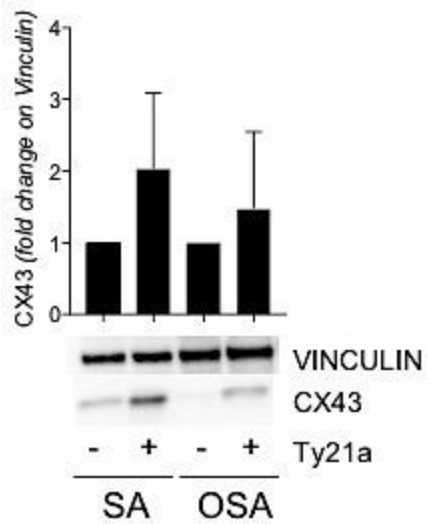

38

39 **Figure S3 *Salmonella* infection of SA and OSA primary canine cells**  
 40 **induce CX43 expression.** CX43 and Vinculin expression in OSA19 and SA5  
 41 primary tumor cells tested by western blot after *Salmonella* infection (Ty21a).  
 42 Data are pooled from 3 independent analysis. See also Figure 3.

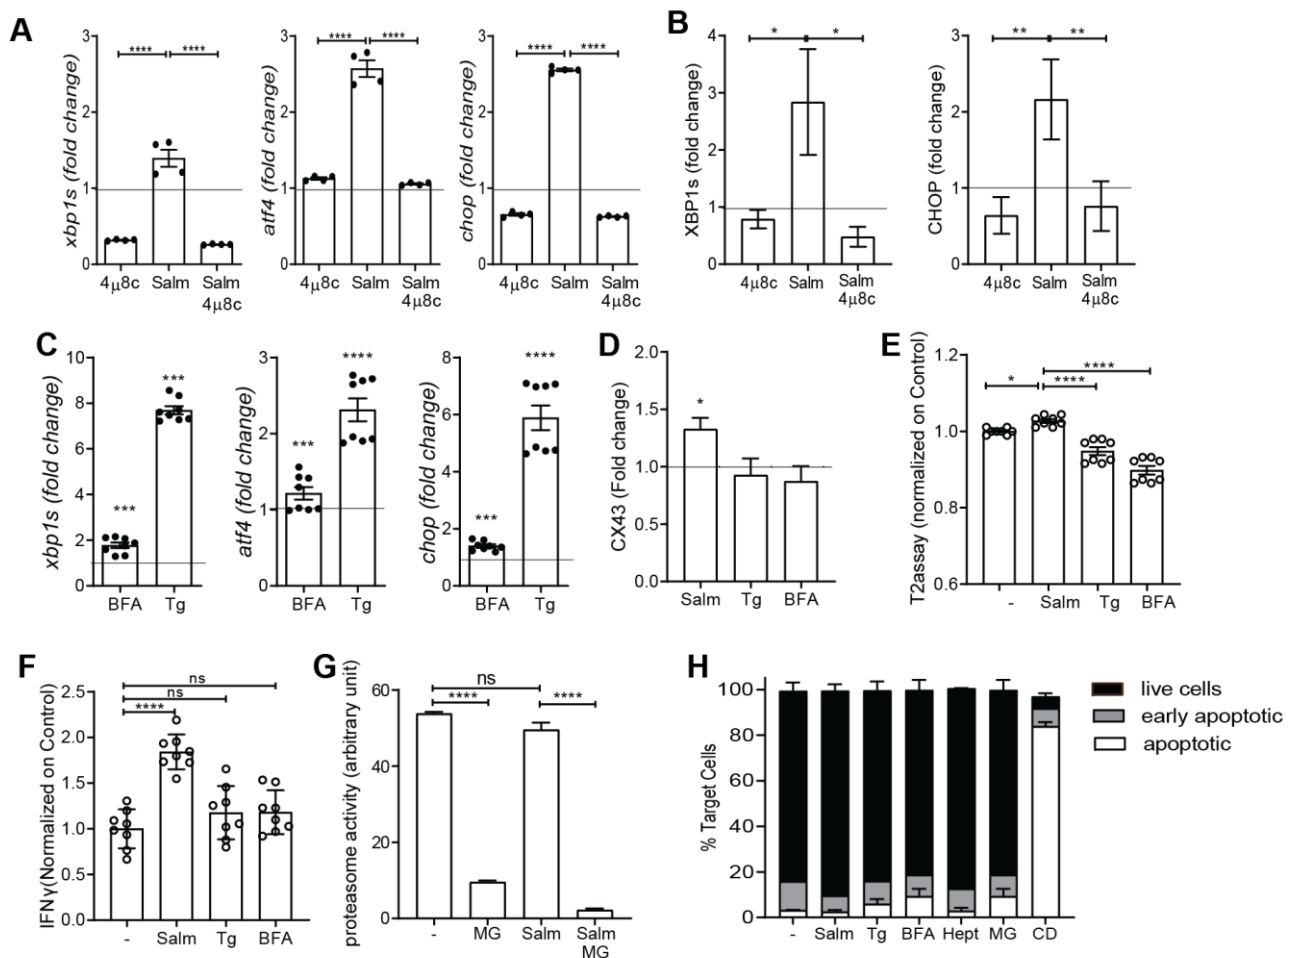

43

44 **Figure S4 Both UPR exacerbation and hemichannels opening are**  
 45 **necessary for peptide release.** (A-B) Expression of UPR pathway at (A) gene  
 46 and (B) protein level in 624-38 cells treated with 4 $\mu$ 8c with or without  
 47 *Salmonella* (salm) infection. Data are normalized to (A) *Gapdh* or on (B)  
 48 Vinculin and expressed as mean  $\pm$  SEM of the fold change of the average  
 49 expression. (C) Expression of *xbp1s*, *atf4*, *chop* at gene level in 624-38  
 50 melanoma cells treated with Tg and BFA. (D) CX43 protein expression in 624-  
 51 38 treated with either *Salmonella* or thapsigargin (Tg) or BFA. (E) MFI of HLA-  
 52 A\*02:01 on T2-cells loaded with secretomes of 624-38 cells treated with either  
 53 *Salmonella*, or Tg, or BFA. Data of three pooled experiments normalized on (-  
 54 ) are represented as mean  $\pm$  SEM using a scatter dot plot. (F) ELISA  
 55 quantification of IFN- $\gamma$  released by CTL Vax upon stimulation with differently  
 56 sourced secretomes. Data of three pooled experiments normalized on (-) are

57 represented as mean  $\pm$  SEM using a scatter dot plot. (G) Chymotrypsin-like  
58 proteasome activity of 624-38 cell line. (-) untreated cells, MG132 (MG) treated  
59 cells. (H) Frequency of Annexin<sup>-</sup>PI<sup>-</sup> (live), Annexin<sup>+</sup>PI<sup>-</sup> (early-apoptotic),  
60 Annexin<sup>+</sup>PI<sup>+</sup> (apoptotic) 624-38 tumor cells. Treated with MG, Tg, Hept, Salm,  
61 left untreated (-), with a lethal concentration of Tg: Dead-cells (CD). Statistical  
62 analysis was evaluated using two-sided Mann-Whitney test (A,B,E,F,G) or one-  
63 way ANOVA followed by multiple comparisons (Dunnet) (C,D). \* $P < 0,05$   
64 \*\* $P < 0.01$ . See also Figure 4.

65



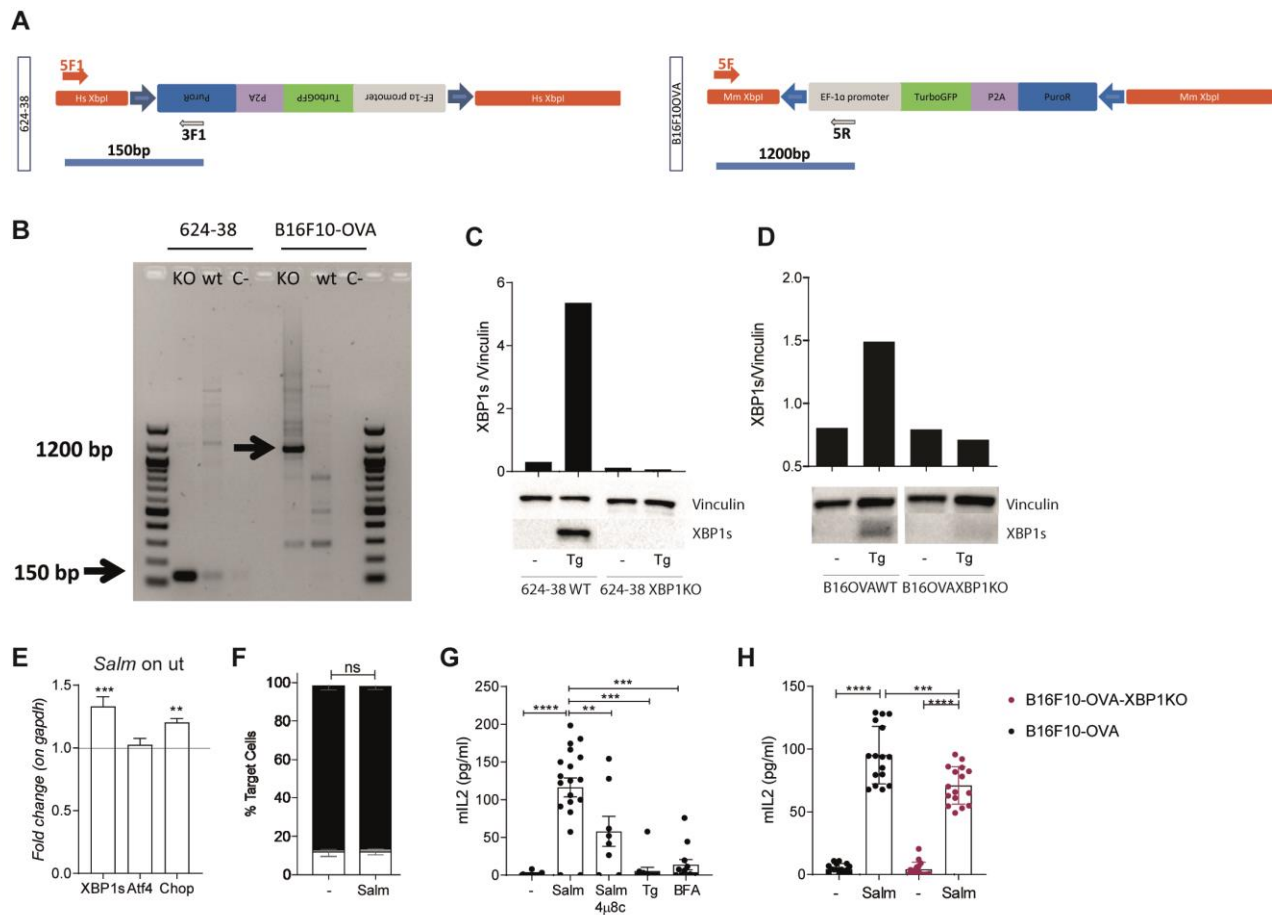

66

67 **Figure S5. *Salmonella* infected murine melanoma cells release antigenic**  
 68 **peptides upon induction of the ER-stress response 624-38 and B16F10-**  
 69 **OVA XBP1KO cells.** (A) Scheme of the PCR amplification strategy (B) PCR  
 70 products analysis (C,D) Western blot quantification of XBP1s in (C) 624-  
 71 38WT and in CRISPR/Cas9 Xbp1 knockout 624-38 (624-38 XBP1KO) cells  
 72 and in (D) B16OVAWT and in CRISPR/Cas9 Xbp1 knockout B16OVA  
 73 (B16OVAXBP1KO), treated for 4 hours with Tg or left untreated (-) (E-F)  
 74 B16F10-OVA cells were infected with *Salmonella* (Salm) or left untreated (-).  
 75 (E) Expression analysis of ER-stress genes. (F) Frequency of Annexin<sup>-</sup>PI<sup>-</sup>  
 76 (live), Annexin<sup>+</sup>PI<sup>-</sup> (early-apoptotic), Annexin<sup>+</sup>PI<sup>+</sup> (apoptotic) tumor cells. (G-H)  
 77 ELISA quantification of mIL2 secretion by OVA<sub>257-264</sub>-specific B3Z cells. (E-H)  
 78 Data of three pooled experiments are represented as mean ± SEM using a  
 79 (E) bar plot (G,H) scatter dot plot. Statistical analysis was evaluated using (E)

80 two-sided Mann-Whitney test, or (G,H) one-way ANOVA followed by multiple  
81 comparisons (Dunnet). \* $P < 0,05$  \*\* $P < 0.01$ . See also Figure 4, S4, S6.

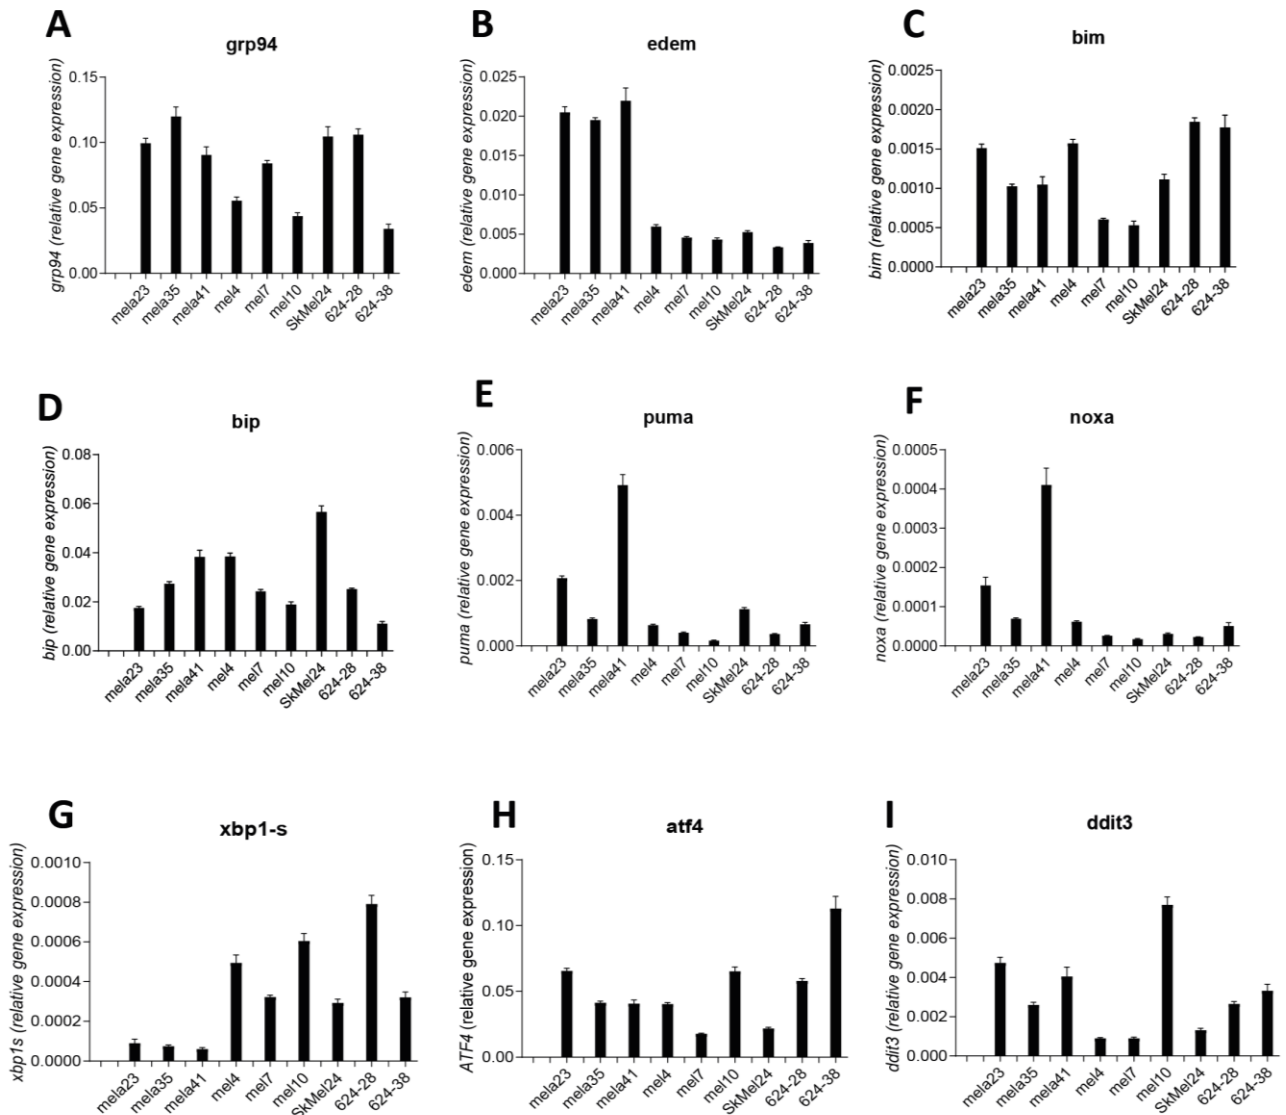

82

83 **Figure S6. UPR-pathway is activated in melanoma cells and not in healthy**  
 84 **melanocytes cells at steady state.** Gene expression of UPR-related genes  
 85 such as chaperones (grp94, edem, bip), pro-apoptotic mediators (bbc3, noxa,  
 86 bim), and transcription factors (s-xbp1, atf4, ddit3) monitored in three  
 87 melanocyte primary cells (mela23,35,41), three primary melanoma cells  
 88 (mel4,7,10), and three melanoma cell lines (SkMel24, 624-28, 624-38). See  
 89 also Figure 4, S4, S5.

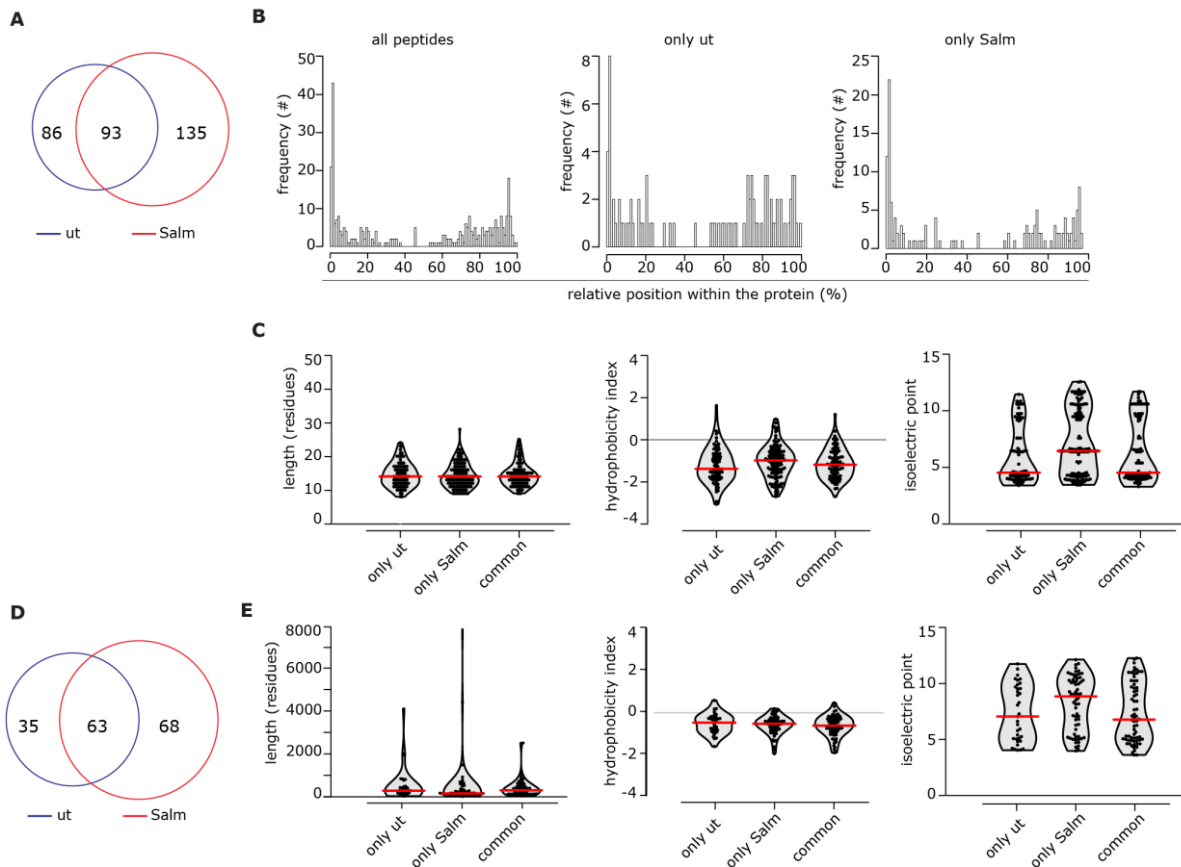

90

91 **Figure S7. Characteristics of the 624-38 cell line secretomes.** (A)  
 92 Frequency of peptides identified only in the secretome of Salmonella-infected  
 93 or not-infected 624-38 melanoma cell line or present in both. The peptides  
 94 reported in the Venn diagram are unique peptides identified in at least one  
 95 secretome. (B) Relative distribution of the secretome's peptides within the  
 96 cognate protein sequence. (C) Distribution of length, hydrophobicity and  
 97 isoelectric point of peptides identified. (D) Frequency of proteins having at least  
 98 one peptide identified in the secretomes. (E) Distribution of length,  
 99 hydrophobicity and isoelectric point of proteins having at least one peptide  
 100 identified in the secretomes. In C and E, the violin plots indicate the frequency  
 101 of the peptides/proteins, with all single peptides/proteins indicated as dots. Red  
 102 lines indicate the median. See also Figure 5, 6.

103

**Table S3. Primer list.** See also Figure 4, S4-6.

104

|                                                   | <b>Forward primer</b>   | <b>Reverse primer</b> |
|---------------------------------------------------|-------------------------|-----------------------|
| Mm sXBP1 transcript variant 2                     | ctgagtccgaatcaggtgcag   | gtccatgggaagatgttctgg |
| Mm usXBP1 transcript variant 1                    | cagcactcagactatgtgca    | gtccatgggaagatgttctgg |
| Mm total XBP1                                     | tggccgggtctgctgagtccg   | gtccatgggaagatgttctgg |
| Mm activating transcription factor 4 (Atf4)       | gggttctgtcttccactcca    | aagcagcagagtcaggctttc |
| Mm DNA-damage inducible transcript 3 (Ddit3) CHOP | ccaccacacctgaaagcagaa   | aggtgaaaggcagggactca  |
| Hs sXBP1 transcript variant 2                     | ctgagtccgaatcaggtgcag   | atccatggggagatgttctgg |
| Hs usXBP1 transcript variant 1                    | cagcactcagactacgtgca    | atccatggggagatgttctgg |
| Hs total XBP1                                     | tggccgggtctgctgagtccg   | atccatggggagatgttctgg |
| Hs activating transcription factor 4 (Atf4)       | gttctccagcgacaaggcta    | atcctgcttctgttgttgg   |
| Hs DNA-damage inducible transcript 3 (Ddit3) CHOP | agaaccaggaaacggaaacaga  | tctccttcatgcgctgcttt  |
| 5F1 (CRISPR/Cas9-XBP1-Human)                      | tctggagctatggtggtggt    |                       |
| 3F1 (CRISPR/Cas9-XBP1-Human)                      | gcaacctccccttctacgag    |                       |
| 5F (CRISPR/Cas9-XBP1-Mouse)                       | ctggaaatctggcctgagag    |                       |
| 3F (CRISPR/Cas9-XBP1-Mouse)                       | caggtggaagtaattcaaggcac |                       |
